# Supplementary material for: Exercise and Carotid Properties in the Young–The KiGGS-2 Study
Source: PubMed Central journal article supplement (PMC8766972; doi:10.3389/fcvm.2021.767025), 2022-01-05
Supplement: Data_Sheet_1.pdf [file Data_Sheet_1.pdf]

## *Supplementary Material*

**Table S1: Track of weekly exercise between KiGGS-Wave-1 and KiGGS-Wave-2.** At KiGGS-Wave 2, 24.9% of all participants reported higher amounts, 38.5% reported no change and 36.7% reported lower amounts of exercise than at KiGGS-Wave-1.

| Weekly exercise at KiGGS-Wave-1 | Weekly exercise at KiGGS-Wave-2 |          |             |          |        |
|---------------------------------|---------------------------------|----------|-------------|----------|--------|
|                                 | none                            | <2 hours | 2 - 4 hours | ≥4 hours | Total  |
| none                            | 7.15%                           | 3.12%    | 1.73%       | 2.19%    | 14.18% |
| <2 hours                        | 10.30%                          | 7.04%    | 5.02%       | 5.21%    | 27.57% |
| 2 - 4 hours                     | 5.11%                           | 6.01%    | 6.20%       | 7.59%    | 24.90% |
| ≥4 hours                        | 4.29%                           | 5.14%    | 5.85%       | 18.06%   | 33.34% |
| Total                           | 26.85%                          | 21.31%   | 18.80%      | 33.04%   | 100%   |

Notes: n = 2,893; weighted estimations; Blue color = higher amounts of exercise at KiGGS-Wave-2; Yellow color = no change of exercise at KiGGS-Wave-2; Orange color = lower amounts of exercise at KiGGS-Wave-2.

**Table S2: Weighted multivariable linear regressions of associations of carotid intima-media thickness (cIMT), parameters of carotid stiffness (cS) and cardiovascular risk (CV-R) with cross-sectional exercise at KiGGS-Wave-2.** CV-R was lower with high amounts of cross-sectional exercise (4+ hours) than with no regular exercise. No such associations were observed for cIMT and parameters of cS.

|                              | Exercise at KiGGS-Wave-2 |               |                |
|------------------------------|--------------------------|---------------|----------------|
|                              | up to 2 hours            | 2-4 hours     | 4+ hours       |
| <b>cIMT</b>                  |                          |               |                |
| Coefficient estimate         | -0.01                    | 0.03          | 0.04           |
| 95% Confidence Interval      | [-0.16, 0.14]            | [-0.12, 0.17] | [-0.10, 0.18]  |
| <b>cS</b>                    |                          |               |                |
| <b>DC</b>                    |                          |               |                |
| Coefficient estimate         | 0.02                     | 0.00          | -0.03          |
| 95% Confidence Interval      | [-0.13, 0.16]            | [-0.15, 0.15] | [-0.16, 0.09]  |
| <b><math>\beta</math>-SI</b> |                          |               |                |
| Coefficient estimate         | -0.01                    | 0.01          | 0.05           |
| 95% Confidence Interval      | [-0.16, 0.15]            | [-0.14, 0.17] | [-0.08, 0.18]  |
| <b>YEM</b>                   |                          |               |                |
| Coefficient estimate         | -0.01                    | -0.01         | 0.00           |
| 95% Confidence Interval      | [-0.17, 0.14]            | [-0.15, 0.13] | [-0.13, 0.13]  |
| <b>EP</b>                    |                          |               |                |
| Coefficient estimate         | -0.02                    | 0.00          | 0.03           |
| 95% Confidence Interval      | [-0.17, 0.13]            | [-0.15, 0.14] | [-0.09, 0.16]  |
| <b>CV-R</b>                  |                          |               |                |
| Coefficient estimate         | -0.40                    | -0.57         | -0.73**        |
| 95% Confidence Interval      | [-0.93, 0.13]            | [-1.14, 0.00] | [-1.26, -0.19] |

Notes: Reference category: no regular exercise at KiGGS-Wave-2. Adjusted for sex, age, height and mean arterial pressure. DC= distensibility coefficient.  $\beta$ -SI=  $\beta$ -stiffness index. YEM= Young's elastic modulus. EP= Peterson's elastic modulus. Significance codes: \* =  $p < 0.05$ , \*\* =  $p < 0.01$ , \*\*\* =  $p < 0.001$ .

**Table S3: Weighted multivariable linear regressions of associations of carotid intima-media thickness (cIMT), parameters of carotid stiffness (cS) and cardiovascular risk (CV-R) with trajectories of exercise from KiGGS-Wave-1 to KiGGS-Wave-2.** Only with regularly high amounts of exercise (“high-high”) CV-R was significantly lower than with regularly low amounts of exercise (“low-low”). No such associations were found for parameters of cS and cIMT. The tendency towards a higher cIMT with trajectories of higher amounts of exercise (“low-high” and “high-high”) displays a small effect. However, this might indicate a tendency towards an adaptive increase of cIMT in individuals who have been physically active for many years.

|                         | Exercise trends |               |               |
|-------------------------|-----------------|---------------|---------------|
|                         | Low - high      | High - low    | High - high   |
| <b>cIMT</b>             |                 |               |               |
| Coefficient estimate    | 0.19*           | 0.11          | 0.13*         |
| 95% Confidence Interval | [0.04, 0.34]    | [-0.06, 0.28] | [0.00, 0.26]  |
| <b>cS</b>               |                 |               |               |
| DC                      |                 |               |               |
| Coefficient estimate    | 0.09            | 0.00          | 0.01          |
| 95% Confidence Interval | [-0.06, 0.23]   | [-0.15, 0.15] | [-0.12, 0.14] |
| $\beta$ -SI             |                 |               |               |
| Coefficient estimate    | -0.10           | -0.04         | 0.01          |
| 95% Confidence Interval | [-0.26, 0.07]   | [-0.19, 0.11] | [-0.13, 0.15] |
| YEM                     |                 |               |               |
| Coefficient estimate    | -0.16*          | -0.08         | -0.06         |
| 95% Confidence Interval | [-0.31, -0.01]  | [-0.23, 0.08] | [-0.20, 0.07] |
| EP                      |                 |               |               |
| Coefficient estimate    | -0.10           | -0.01         | -0.02         |
| 95% Confidence Interval | [-0.24, 0.05]   | [-0.16, 0.14] | [-0.15, 0.12] |
| <b>CV-R</b>             |                 |               |               |
| Coefficient estimate    | 0.25            | -0.43         | -0.37*        |
| 95% Confidence Interval | [-0.38, 0.88]   | [-0.91, 0.06] | [-0.74, 0.00] |

Notes: Trajectories of exercise from KiGGS-Wave-1 to KiGGS-Wave-2: “low-low” (always <2 hours), “low-high” (<2 hours at KiGGS-Wave-1 and  $\geq 2$  hours at KiGGS-Wave-2), “high-low” ( $\geq 2$  hours at KiGGS-Wave-1 and <2 hours at KiGGS-Wave-2), “high-high” (always  $\geq 2$  hours). Reference level of exposure: “low-low”. Adjusted for sex, age, height and mean arterial pressure.  $\beta$ -SI=  $\beta$ -stiffness index. YEM= Young’s elastic modulus. EP= Peterson’s elastic modulus. Significance codes: \* =  $p < 0.05$ , \*\* =  $p < 0.01$ , \*\*\* =  $p < 0.001$ .
